# Supplementary material
Source: publisher site journal article supplement (https://www.spandidos-publications.com/742/downloadSupplementary)

Figure S1. Radiosensitization of T98G cells by IDH1-R132H. (A). Expression levels of IDH1-R132H and TIGAR in T98G cells transfected with the pCMV-IDH1-R132H plasmid were examined by western blot analysis. \* $P < 0.05$  vs. empty vector-transfected cells. (B) The radiosensitivity of T98G cells expressing IDH1-R132H was evaluated by clonogenic assay. \*\* $P < 0.01$  vs. empty vector-transfected cells. IDH1, isocitrate dehydrogenase 1; WT, wild-type; TIGAR, TP53-induced glycolysis and apoptosis regulator.

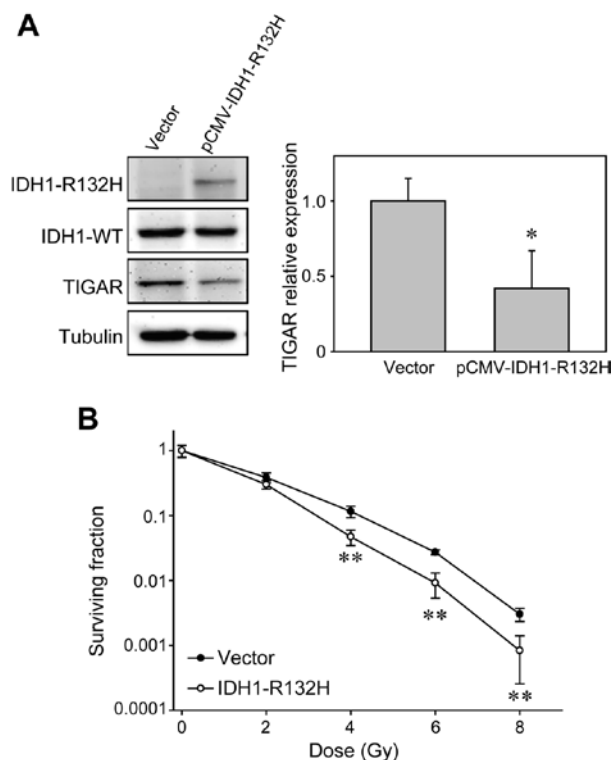

Figure S2. Effects of IDH1-R132H inhibitor AGI-5198 on the expression of TIGAR in U87MG-GSCs. Expression of TIGAR in U87MG-GSCs transfected with the pCMV-IDH1-R132H plasmid and incubated with AGI-5198 was examined by western blot analysis. IDH1, isocitrate dehydrogenase 1; WT, wild-type; TIGAR, TP53-induced glycolysis and apoptosis regulator; GSCs, glioma stem-like cells.

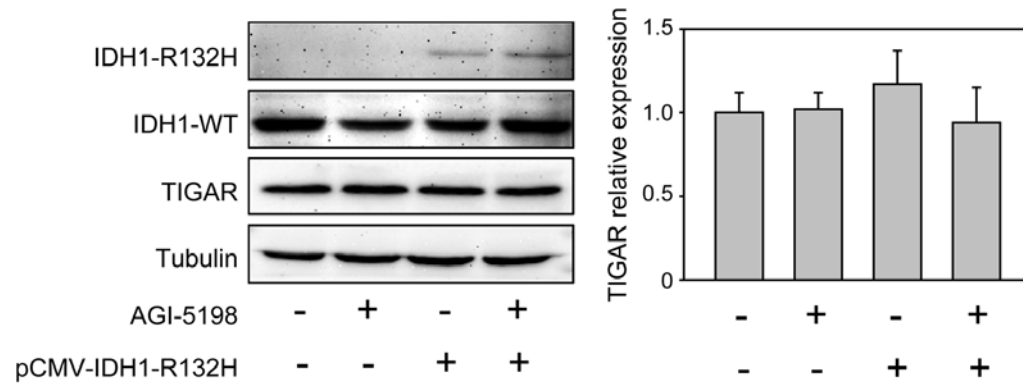

Supplement: Supplementary file 1 [file downloadSupplementary]
